# Supplementary material for: Global transportation infrastructure exposure to the change of precipitation in a warmer world
Source: Research Square preprint supplement (doi:10.21203/rs.3.rs-1285854/v1), 2022-02-10
Supplement: Supplementary file 1 [file 1cd6837b44d56813835e9364.docx]

**Global transportation infrastructure exposure to the change of precipitation in a warmer world**


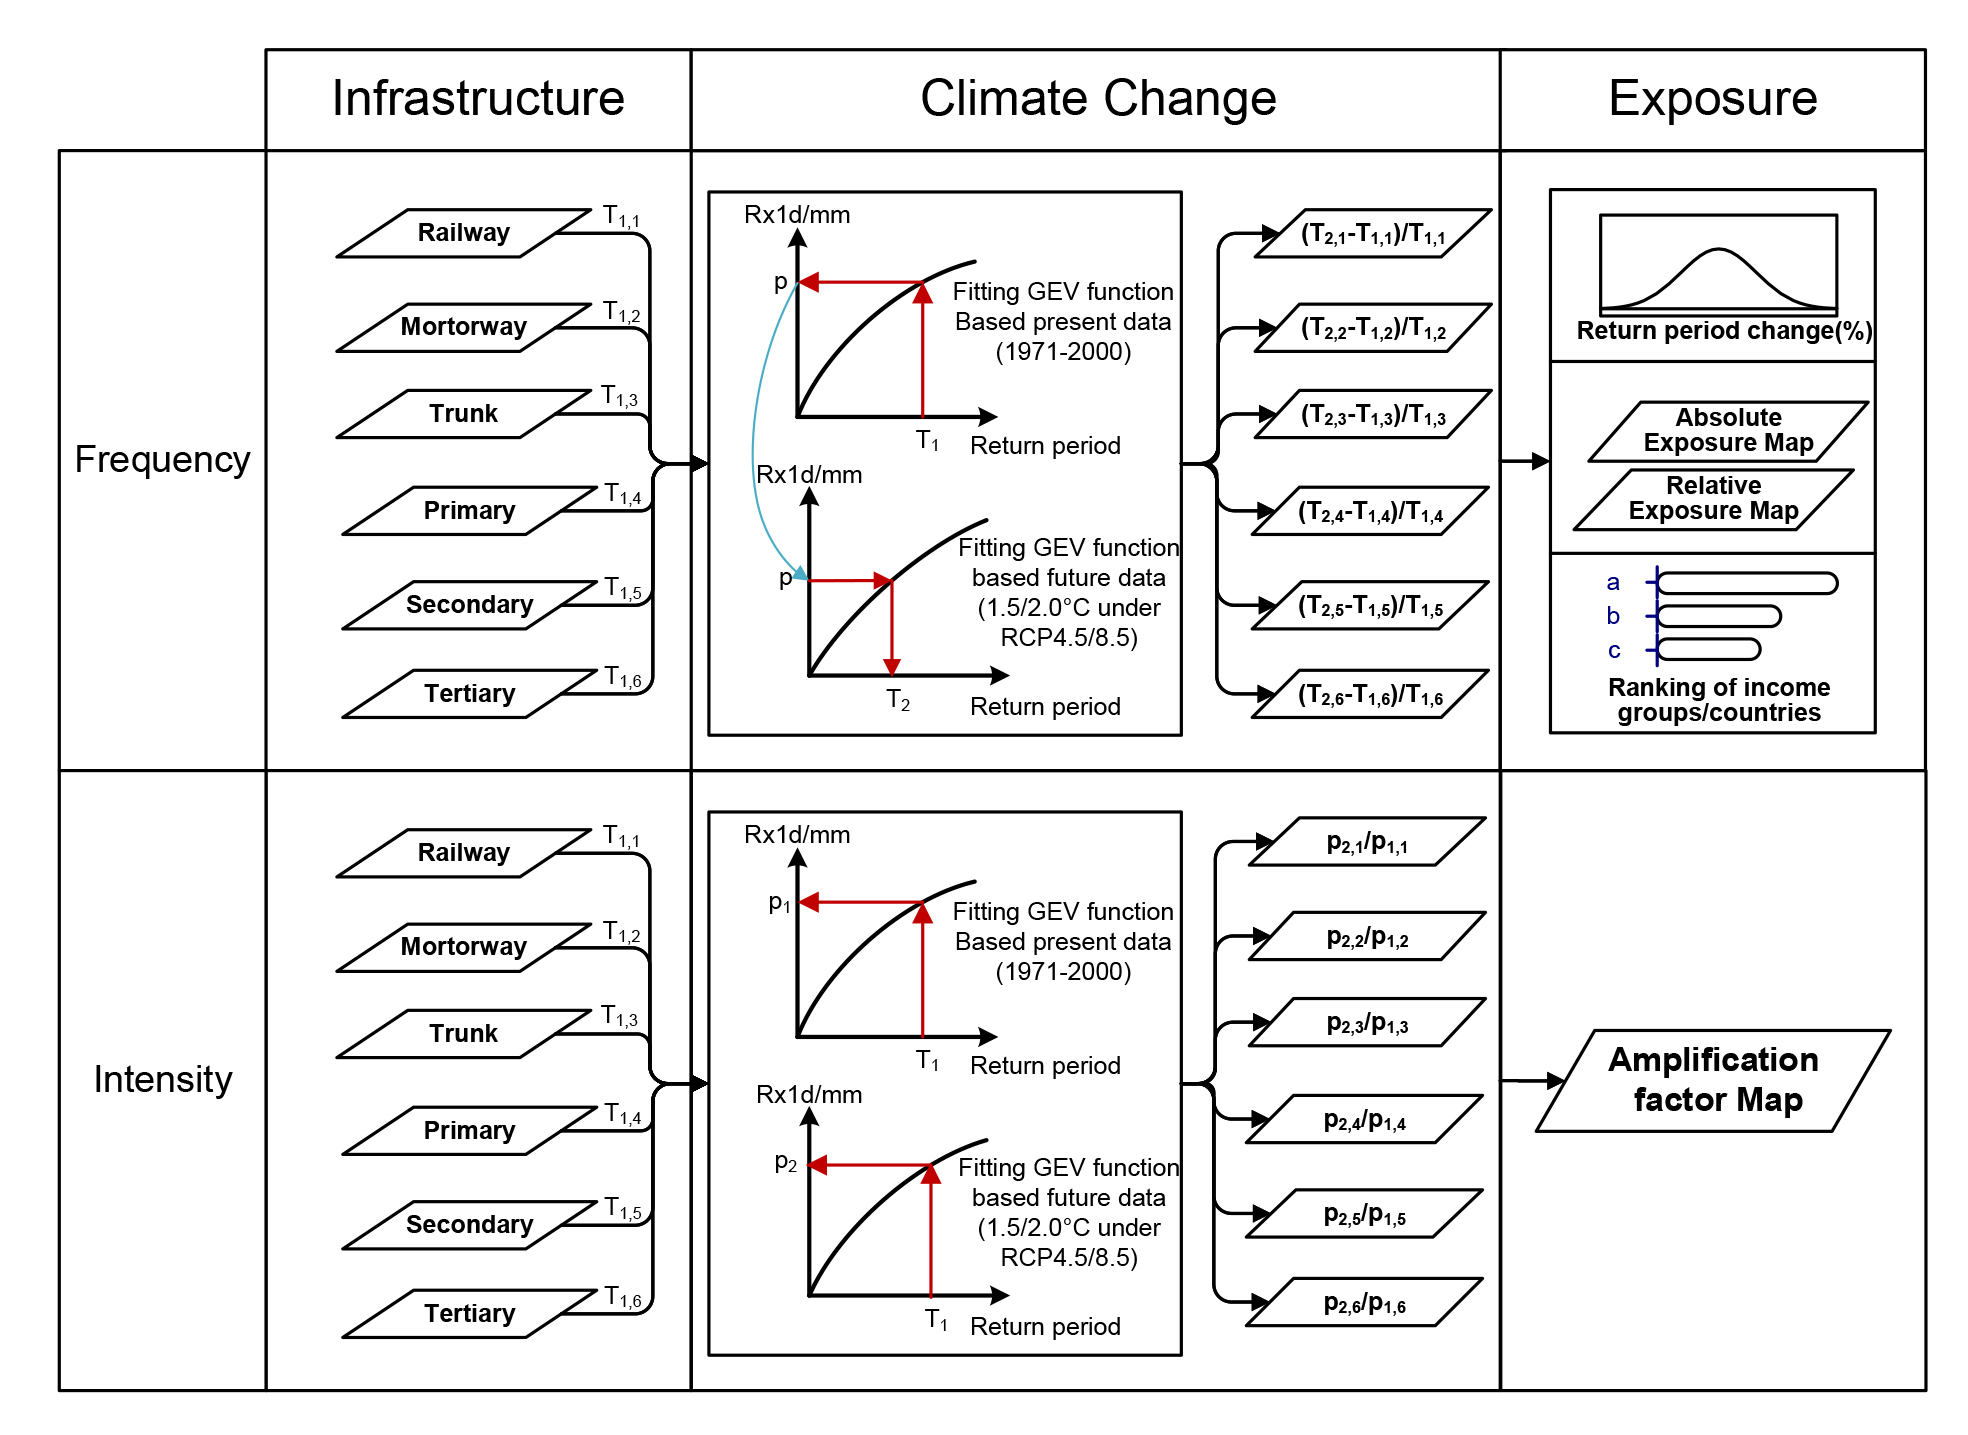


Figure S1 Methodology

Table S1 Design return periods of drainage system of transportation infrastructure

| Income groups | Motorway/Trunk/  Primary/Secondary | Tertiary | Railway |
| --- | --- | --- | --- |
| Low&Low middle income | 2(5) | 0(0) | 10(20) |
| Upper middle income | 5(10) | 2(5) | 20(30) |
| High income | 10(20) | 5(10) | 30(50) |

*The assets with design return period of 0 are not be included in further calculation.

Table S2 Year in which model data reached the warming target

| Models | 1.5°C | | 2.0°C | |
| --- | --- | --- | --- | --- |
| RCP4.5 | RCP8.5 | RCP4.5 | RCP8.5 |
| ACCESS1-0 | 2032 | 2027 | 2053 | 2041 |
| CNRM-CM5 | 2035 | 2029 | 2055 | 2045 |
| CSIRO-Mk3-6-0 | 2035 | 2036 | 2049 | 2045 |
| CanESM2 | 2020 | 2010 | 2030 | 2027 |
| GFDL-CM3 | 2025 | 2026 | 2037 | 2035 |
| GFDL-ESM2G | 2047 | 2037 | - | 2056 |
| GFDL-ESM2M | 2042 | 2036 | 2073 | 2051 |
| inmcm4 | 2060 | 2044 | - | 2059 |
| IPSL-CM5A-LR | 2013 | 2010 | 2032 | 2030 |
| IPSL-CM5A-MR | 2020 | 2013 | 2030 | 2031 |
| MIROC-ESM-CHEM | 2024 | 2019 | 2038 | 2028 |
| MIROC-ESM | 2021 | 2021 | 2034 | 2032 |
| MIROC5 | 2033 | 2028 | 2055 | 2043 |
| MPI-ESM-LR | 2016 | 2014 | 2033 | 2033 |
| MPI-ESM-MR | 2026 | 2017 | 2047 | 2040 |
| MRI-CGCM3 | 2050 | 2043 | 2081 | 2055 |

Note: “-” indicates the time exceeds 2100 and out of consideration

Table S3 Transportation assets used in this study

| Category | Class | Description | Length (km) |
| --- | --- | --- | --- |
| Road | Motorway | A restricted access major divided highway, normally with 2 or more running lanes plus emergency hard shoulder. Equivalent to the Freeway, Autobahn, etc.. | 1,080,680 |
| Trunk | The most important roads in a country's system that aren't motorways. (Need not necessarily be a divided highway.) | 1,799,080 |
| Primary | The next most important roads in a country's system. (Often link larger towns.) | 3,035,180 |
| Secondary | The next most important roads in a country's system. (Often link towns.) | 4,487,574 |
| Tertiary | The next most important roads in a country's system. (Often link smaller towns and villages) | 8,574,914 |
| Railway | Rail | Full sized passenger or freight trains in the standard gauge for the country or state. | 2,654,041 |





Figure S2 Spatial distribution of each category of transportation assets (left panel) and their change of return period (right panel) (a-b) railway (c-d) motorway (e-f) trunk (g-h) primary road (i-j) secondary road (k-l) tertiary road


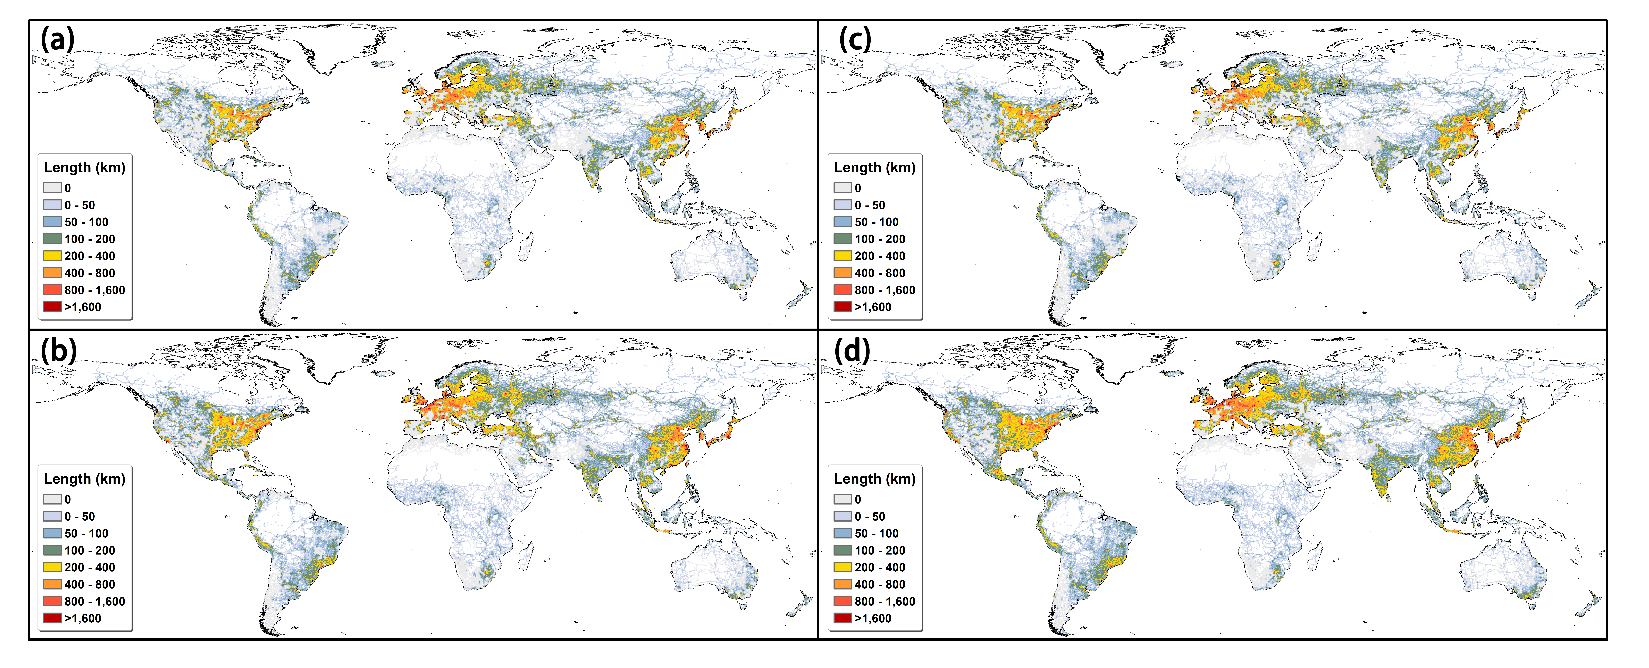


Figure S3. Absolute global transport infrastructure exposure exceeding 25% change in precipitation return periods (based higher current design standards assumption). a) 1.5 oC warming under RCP4.5 scenario b) 2 oC warming under RCP4.5 scenario c) 1.5 oC warming under RCP8.5 scenario d) 2 oC warming under RCP8.5 scenario


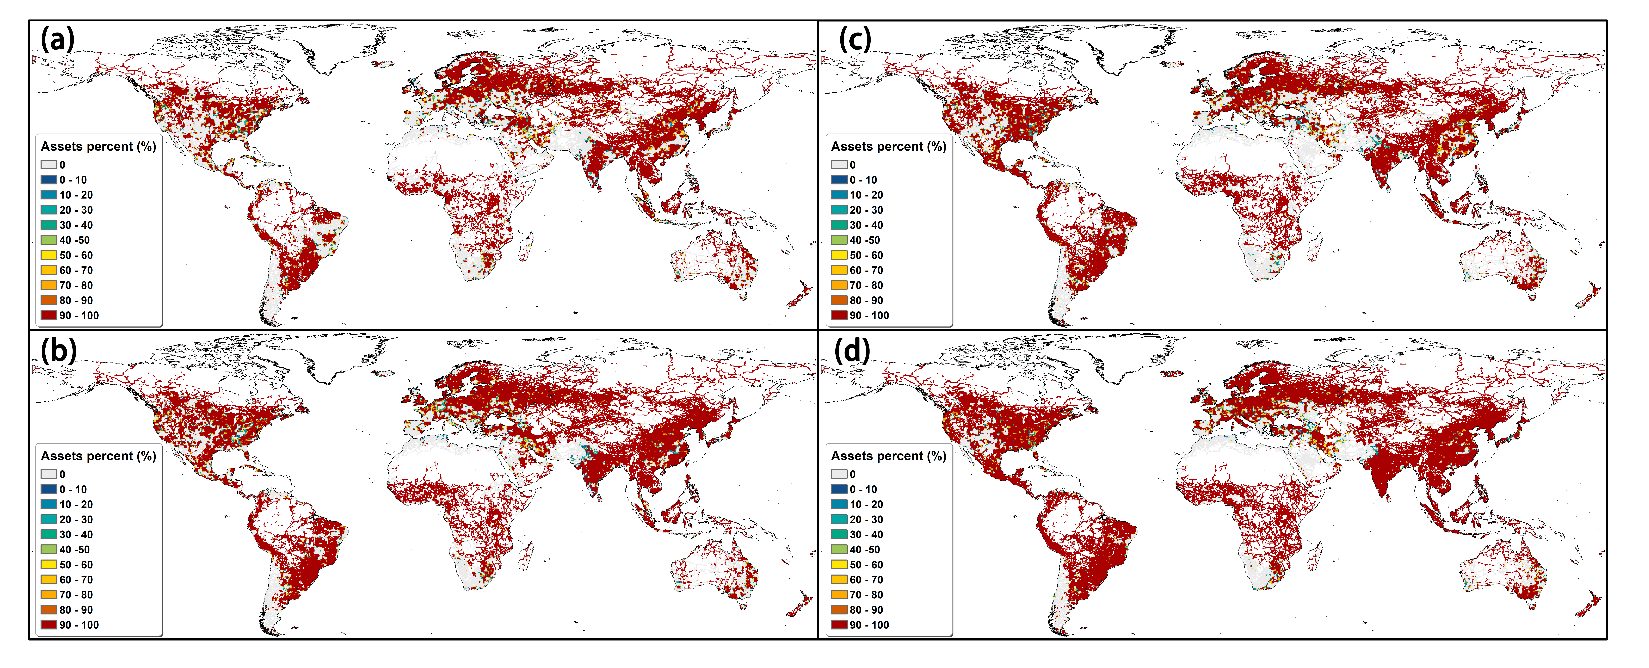


Figure S3. Relative global transport infrastructure exposure exceeding 25% change in precipitation return periods change (based higher current design standards assumption). a) 1.5 oC warming under RCP4.5 scenario b) 2 oC warming under RCP4.5 scenario c) 1.5 oC warming under RCP8.5 scenario d) 2 oC warming under RCP8.5 scenario


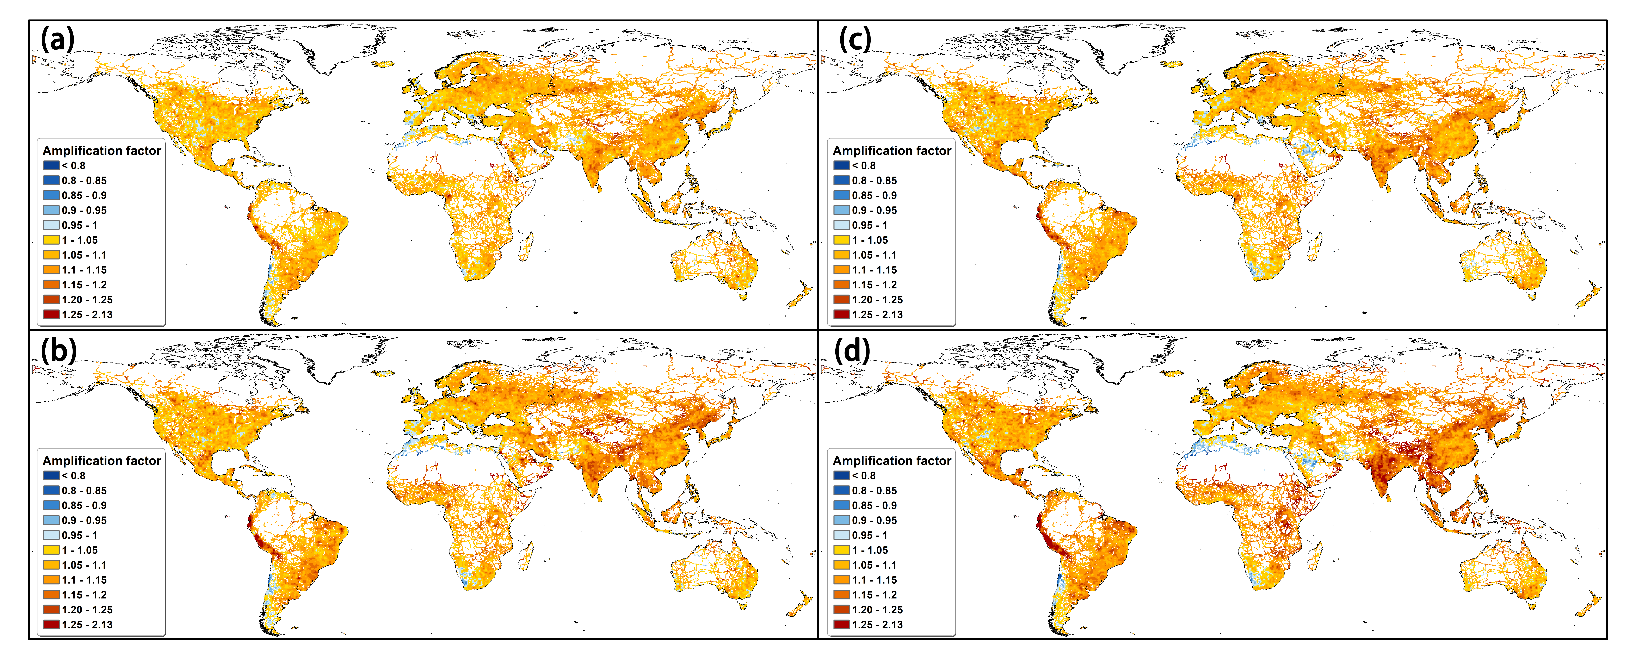


Figure S4. Amplification factor to current design standards (based higher current design standards assumption). a) 1.5 oC warming under RCP4.5 scenario b) 2 oC warming under RCP4.5 scenario c) 1.5 oC warming under RCP8.5 scenario d) 2 oC warming under RCP8.5 scenario
